# Supplementary material for: Preparation and ESR study of Sc3C2@C80 bis-addition fulleropyrrolidines
Source: Royal Society of Chemistry journal article supplement (doi:10.1039/c2dt12162j), 2012-01-01
Supplement: c2dt12162j.pdf [file c2dt12162j.pdf]

## Supporting Information

### Preparation and ESR study of $\text{Sc}_3\text{C}_2@C_{80}$ bis-addition fulleropyrrolidines

Taishan Wang,<sup>\*a§</sup> Jingyi Wu,<sup>a§</sup> Yongqiang Feng,<sup>a</sup> Yihan Ma,<sup>a</sup> Li Jiang,<sup>a</sup> Chunying Shu,<sup>a</sup> and Chunru Wang<sup>\*a</sup>

#### Experimental Section:

##### 1. Synthesis of $\text{Sc}_3\text{C}_2@C_{80}$ fulleropyrrolidines

The synthesis of  $\text{Sc}_3\text{C}_2@C_{80}$  fulleropyrrolidine mono-adduct was carried out in *o*-dichlorobenzene solution of  $\text{Sc}_3\text{C}_2@C_{80}$  with an excess of *N*-ethylglycine and paraformaldehyde at 108 °C for 15 min. The product was isolated and purified by HPLC. The bis-adducts of  $\text{Sc}_3\text{C}_2@C_{80}$  fulleropyrrolidine were prepared from  $\text{Sc}_3\text{C}_2@C_{80}$  fulleropyrrolidine mono-adduct (4 mg) in *o*-dichlorobenzene (10 mL) solution with an excess of *N*-ethylglycine (7 mg) and paraformaldehyde (7 mg) at 108 °C for 20 min. The bis-adducts were also isolated and purified by HPLC.

##### 2. HPLC profiles of $\text{Sc}_3\text{C}_2@C_{80}$ fulleropyrrolidines

The  $\text{Sc}_3\text{C}_2@C_{80}$  fulleropyrrolidine mono-adduct was isolated easily on a Buckyrep-M column. Only one isomer was obtained for mono-adduct. Due to the numerous isomers of bis-adducts, four fractions (fraction 1, fraction 2, fraction 3 and fraction 4) were collected for further separation. Each fraction was isolated using recycling- HPLC, and finally nine isomers (A, B, C, D, E, F, G, H and I) of bis-adducts were obtained.

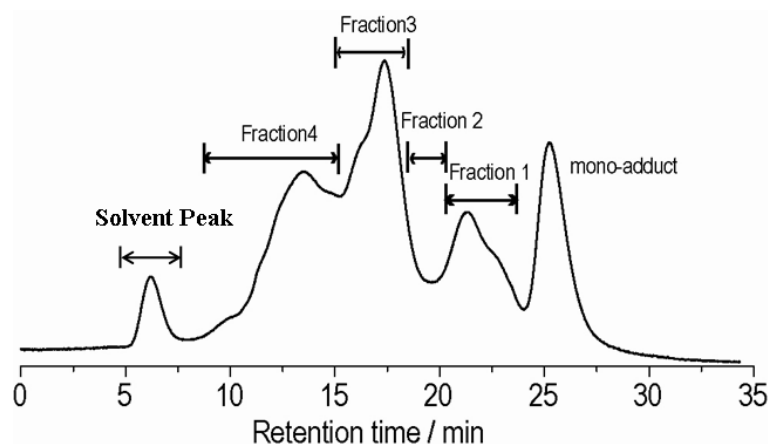

**Figure S1.** The HPLC profile of the reaction mixture treated at 108 °C for 20 min. 20×250 mm Buckyrep-M column; flow rate 12 mL/min; toluene as eluent. Four fractions were collected for further separation.

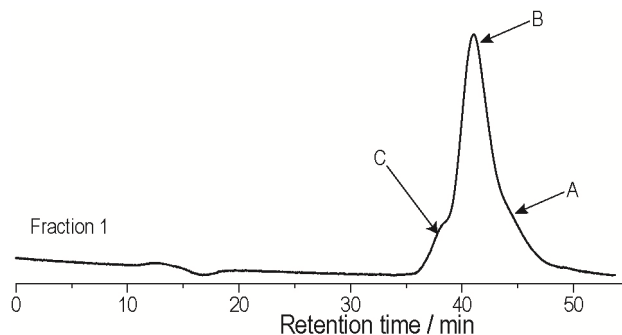

**Figure S2.** The HPLC profile of Fraction 1 for bis-adducts. 20×250 mm Buckyprep-M column; flow rate 6 mL/min; toluene as eluent. The letters of A, B, and C are denoted the three isomers, respectively (similarly hereinafter).

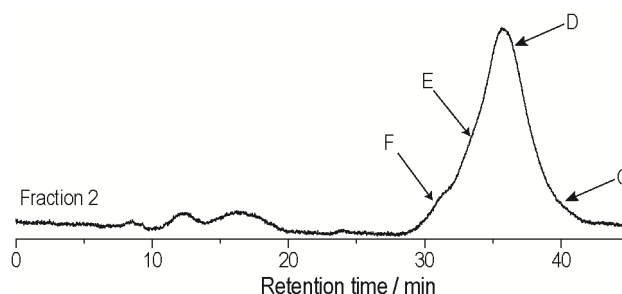

**Figure S3.** The HPLC profile of Fraction 2 for bis-adducts. 20×250 mm Buckyprep-M column; flow rate 6mL/min; toluene as eluent.

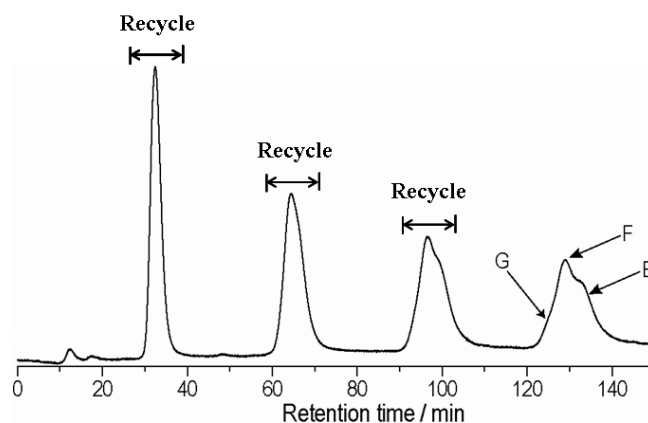

**Figure S4.** The cycling HPLC profile of Fraction 3 for bis-adducts. 20×250 mm Buckyprep-M column; flow rate 6mL/min; toluene as eluent). After three cycles the isomers E, F, and G were well separated and further purification for each isomer underwent the same process. Recycling-HPLC is an useful technique: After passing through the column first time, recycling technique enables the same eluent with the target substances return to the same column again and repeat the cycles until effective separation is made.

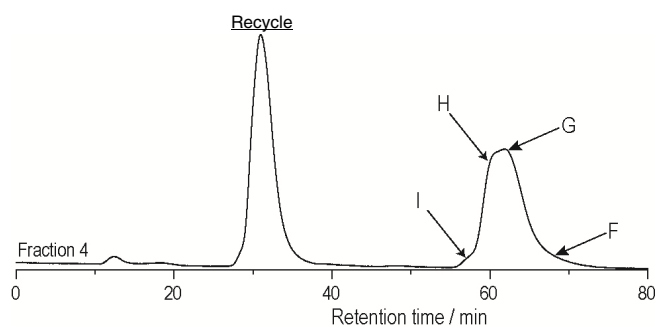

**Figure S5.** The cycling HPLC profile of Fraction 4 for bis-adducts. 20×250 mm Buckyprep-M column; flow rate 6mL/min; toluene as eluent. After one cycle the isomers F, G, H, and I were well separated and further purification for each isomer underwent the same process.

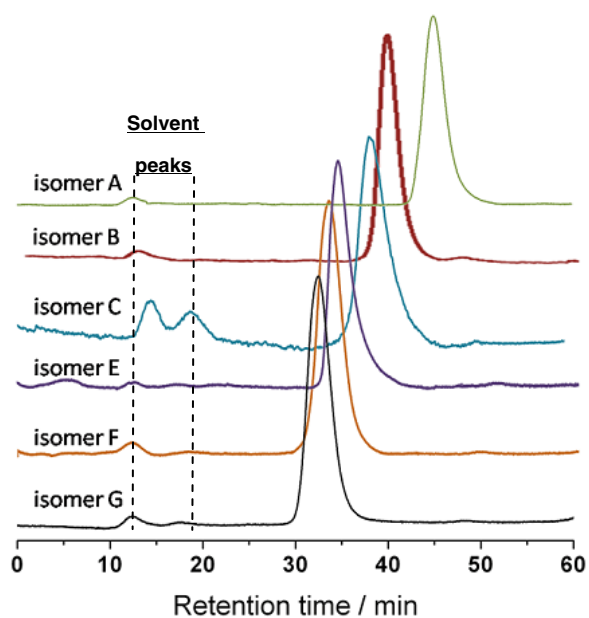

**Figure S6.** The HPLC profiles of the purified bis-adducts of  $\text{Sc}_3\text{C}_2@\text{C}_{80}$ . Buckyprep-M column; flow rate 6mL/min; toluene as eluent. Solvent peaks may be caused by trace of dissolved air and water in sample solvent.

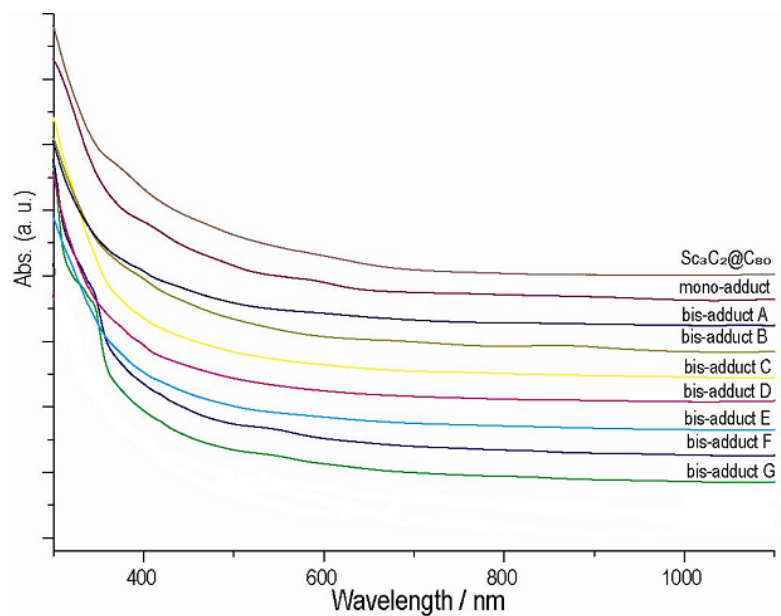

**Figure S7.** UV-Vis absorption spectra of the purified bis-adducts of Sc<sub>3</sub>C<sub>2</sub>@C<sub>80</sub>.

### Calculation Section:

**Table S1** The calculated bis-addition  $\text{Sc}_3\text{C}_2@C_{80}$  fulleropyrrolidines .

| Sample                 | $\Delta E$ (kcal/mol) |
|------------------------|-----------------------|
| Bis-adduct (isomer 1)  | 0                     |
| Bis-adduct (isomer 2)  | 0.5                   |
| Bis-adduct (isomer 3)  | 0.5                   |
| Bis-adduct (isomer 4)  | 0.5                   |
| Bis-adduct (isomer 5)  | 1.3                   |
| Bis-adduct (isomer 6)  | 2.4                   |
| Bis-adduct (isomer 7)  | 2.5                   |
| Bis-adduct (isomer 8)  | 2.7                   |
| Bis-adduct (isomer 9)  | 3.6                   |
| Bis-adduct (isomer 10) | 3.8                   |
| Bis-adduct (isomer 11) | 5.3                   |
| Bis-adduct (isomer 12) | 5.4                   |
| Bis-adduct (isomer 13) | 5.8                   |
| Bis-adduct (isomer 14) | 5.8                   |
| Bis-adduct (isomer 15) | 6.8                   |
| Bis-adduct (isomer 16) | 7.2                   |
| Bis-adduct (isomer 17) | 7.2                   |
| Bis-adduct (isomer 18) | 7.3                   |
| Bis-adduct (isomer 19) | 7.4                   |
| Bis-adduct (isomer 20) | 8.3                   |
| Bis-adduct (isomer 21) | 8.4                   |
| Bis-adduct (isomer 22) | 9.1                   |
| Bis-adduct (isomer 23) | 9.3                   |
| Bis-adduct (isomer 24) | 10.2                  |
| Bis-adduct (isomer 25) | 11.2                  |
| Bis-adduct (isomer 26) | 19.3                  |

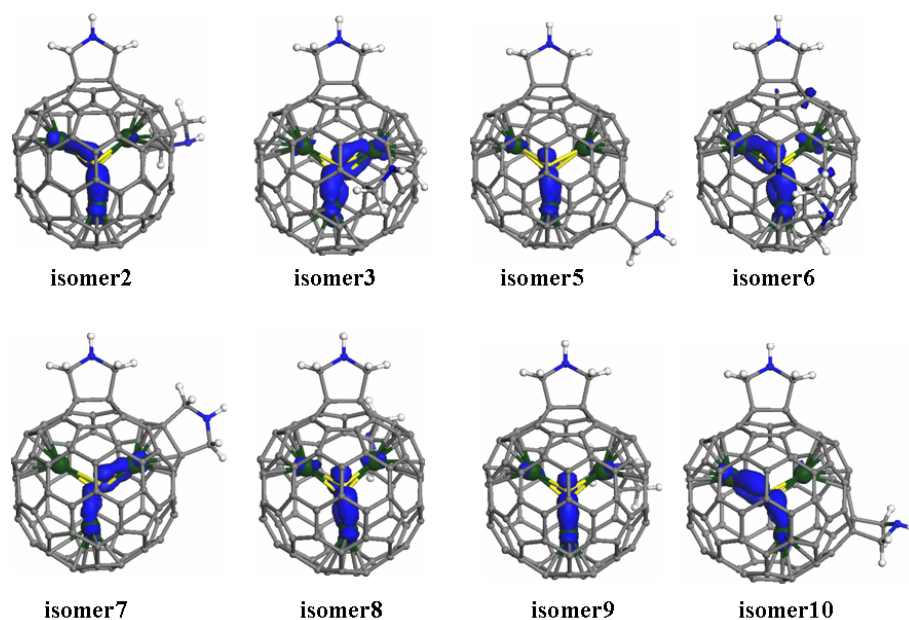

**Figure S8.** The calculated spin density distributions of  $\text{Sc}_3\text{C}_2@C_{80}$  and its fulleropyrrolidines. The blue area presents the unpaired spin.

Cartesian coordinates of the ten most stable isomers.

isomer 1

|    |           |           |           |
|----|-----------|-----------|-----------|
| C  | -0.467219 | -4.907467 | 3.147697  |
| C  | -1.639013 | -3.277878 | 4.306772  |
| H  | -2.659556 | -3.644711 | 4.069967  |
| H  | -1.693165 | -2.636593 | 5.198695  |
| H  | 0.406077  | -5.574690 | 3.117867  |
| H  | -1.351428 | -5.461884 | 2.767097  |
| N  | -0.652940 | -4.336651 | 4.476513  |
| H  | -0.928605 | -5.027387 | 5.176411  |
| Sc | 0.802246  | -2.184229 | -0.570877 |
| Sc | 0.043049  | 1.157491  | 1.402676  |
| Sc | 0.057006  | 1.197060  | -2.085267 |
| C  | 1.053188  | 0.037415  | -0.321907 |
| C  | -0.231828 | -0.231826 | -0.349274 |
| C  | -2.413034 | 3.324163  | -1.171780 |
| C  | -2.780222 | 2.005166  | -1.815524 |
| C  | -2.151627 | 1.635210  | -3.052495 |
| C  | 4.383460  | -1.069554 | -1.077554 |
| C  | -2.411953 | 3.324463  | 0.466112  |
| C  | -2.162742 | 1.639727  | 2.361440  |
| C  | -2.780454 | 2.007530  | 1.116988  |
| C  | -3.412264 | 0.996922  | 0.384603  |
| C  | -3.436374 | -0.374075 | -1.508864 |
| C  | -2.759187 | -0.783469 | -2.681986 |
| C  | -2.120242 | 0.245302  | -3.440680 |
| C  | -2.169512 | -2.086313 | -2.714931 |
| C  | -3.438417 | -1.216372 | -0.337605 |
| C  | -2.114413 | -2.863998 | 0.893846  |
| C  | -2.758623 | -2.460025 | -0.332010 |
| C  | -2.165315 | -2.911343 | -1.542371 |
| C  | -2.146258 | 0.258642  | 2.774562  |
| C  | -2.755229 | -0.785814 | 2.007063  |
| C  | -3.419404 | -0.373105 | 0.818927  |
| C  | -2.187637 | -2.089127 | 2.062880  |
| C  | 1.888972  | 2.241582  | -3.490606 |
| C  | 1.238950  | 1.190062  | -4.235251 |
| C  | -0.925167 | 0.005142  | -4.194308 |
| C  | -0.210873 | 1.260468  | -4.339009 |
| C  | 1.116899  | 3.249623  | -2.774929 |
| C  | -0.957874 | 3.606067  | -1.539419 |
| C  | -0.332984 | 3.303263  | -2.798821 |
| C  | -1.002472 | 2.316743  | -3.661253 |
| C  | 1.876079  | 3.579823  | 0.865312  |
| C  | 1.229994  | 3.899599  | -0.357388 |

|   |           |           |           |
|---|-----------|-----------|-----------|
| C | 1.873084  | 3.574483  | -1.580405 |
| C | -0.204717 | 3.879482  | -0.356122 |
| C | 1.850024  | -0.073779 | 3.500681  |
| C | -0.310583 | -1.274895 | 3.492121  |
| C | 1.076144  | -1.301513 | 3.495333  |
| C | -1.108084 | -2.496716 | 3.058106  |
| C | 3.068387  | -0.324367 | 2.774787  |
| C | 4.385359  | 0.301952  | 0.811569  |
| C | 3.701557  | 0.694346  | 2.003367  |
| C | 3.097386  | 1.993588  | 2.037114  |
| C | 3.040896  | -3.117011 | 0.353532  |
| C | 3.669703  | -2.058482 | 1.090624  |
| C | 3.053357  | -1.685961 | 2.321764  |
| C | 4.380133  | -1.064211 | 0.363879  |
| C | -0.264137 | -3.648825 | 2.256547  |
| C | 1.191440  | -3.317190 | 2.009990  |
| C | 1.826925  | -2.302370 | 2.742749  |
| C | 1.841103  | -3.791332 | 0.814055  |
| C | -0.932495 | -3.697043 | 0.887884  |
| C | -0.958539 | -3.712436 | -1.542127 |
| C | -0.329059 | -4.164814 | -0.314467 |
| C | 1.138639  | -4.340425 | -0.351425 |
| C | 4.385545  | 1.143673  | -0.356946 |
| C | 3.700984  | 2.393201  | -0.355347 |
| C | 3.095659  | 2.825817  | 0.868335  |
| C | 3.090939  | 2.814126  | -1.578891 |
| C | 1.115956  | 3.249523  | 2.056746  |
| C | -0.333536 | 3.298076  | 2.080760  |
| C | -0.958334 | 3.609713  | 0.826762  |
| C | -1.006562 | 2.327068  | 2.956176  |
| C | 1.887693  | 2.257122  | 2.780505  |
| C | -0.935435 | 0.019085  | 3.512136  |
| C | 1.230708  | 1.213971  | 3.536462  |
| C | -0.217250 | 1.280561  | 3.643510  |
| C | 4.389568  | 0.300773  | -1.523646 |
| C | 3.106657  | -0.338211 | -3.504629 |
| C | 3.712082  | 0.687335  | -2.718219 |
| C | 3.098623  | 1.982454  | -2.747020 |
| C | 3.070721  | -3.156022 | -1.080298 |
| C | 3.107851  | -1.705375 | -3.062928 |
| C | 3.701723  | -2.076603 | -1.817960 |
| C | -3.417772 | 0.997427  | -1.079505 |
| C | -0.201680 | -3.338304 | -2.713372 |
| C | 1.880651  | -2.326313 | -3.494339 |
| C | 1.236763  | -3.356629 | -2.723630 |

|   |           |           |           |
|---|-----------|-----------|-----------|
| C | 1.902170  | -3.891042 | -1.545000 |
| C | 1.875212  | -0.098288 | -4.217228 |
| C | 1.124064  | -1.333378 | -4.217302 |
| C | -0.293135 | -1.297020 | -4.158986 |
| C | -0.955921 | -2.331774 | -3.436974 |
| C | -3.381262 | 4.489650  | 0.805794  |
| C | -3.382092 | 4.489016  | -1.510962 |
| H | -4.399320 | 4.062456  | -1.641133 |
| H | -3.090356 | 4.998568  | -2.440421 |
| H | -3.088319 | 4.999106  | 1.734980  |
| H | -4.398408 | 4.063324  | 0.936979  |
| N | -3.253559 | 5.369956  | -0.352707 |
| H | -3.947049 | 6.119524  | -0.352569 |

isomer 2

|    |           |           |           |
|----|-----------|-----------|-----------|
| C  | 2.150883  | 3.230903  | 4.683950  |
| C  | 4.090944  | 2.797168  | 3.495544  |
| H  | 4.234336  | 3.827271  | 3.107118  |
| H  | 5.052650  | 2.266949  | 3.451659  |
| H  | 1.555383  | 3.049055  | 5.590669  |
| H  | 2.079548  | 4.308794  | 4.420775  |
| N  | 3.518115  | 2.748402  | 4.835562  |
| H  | 4.059190  | 3.283770  | 5.516925  |
| Sc | 0.391053  | -2.161246 | 0.008846  |
| Sc | -0.384556 | 1.213952  | 1.680437  |
| Sc | -0.377017 | 1.163828  | -1.755963 |
| C  | 0.635888  | 0.067935  | 0.014331  |
| C  | -0.644964 | -0.245997 | -0.066703 |
| C  | -2.762772 | 3.356658  | -0.808482 |
| C  | -3.145500 | 2.053737  | -1.482510 |
| C  | -2.516444 | 1.703609  | -2.728854 |
| C  | 3.992268  | -1.092604 | -0.719525 |
| C  | -2.771776 | 3.336944  | 0.830258  |
| C  | -2.565597 | 1.639849  | 2.693556  |
| C  | -3.169206 | 2.016700  | 1.452778  |
| C  | -3.817318 | 1.024680  | 0.693455  |
| C  | -3.830389 | -0.326528 | -1.218152 |
| C  | -3.143876 | -0.716178 | -2.397965 |
| C  | -2.494883 | 0.318867  | -3.140569 |
| C  | -2.567081 | -2.025442 | -2.445971 |
| C  | -3.875291 | -1.189058 | -0.072421 |
| C  | -2.621416 | -2.913300 | 1.132716  |
| C  | -3.222418 | -2.456266 | -0.081535 |
| C  | -2.596476 | -2.877012 | -1.297886 |
| C  | -2.542761 | 0.242806  | 3.055186  |



|   |           |           |           |
|---|-----------|-----------|-----------|
| C | -3.187511 | -0.774563 | 2.282554  |
| C | -3.854723 | -0.350976 | 1.104037  |
| C | -2.611684 | -2.086100 | 2.303485  |
| C | 1.546070  | 2.270434  | -3.107153 |
| C | 0.891085  | 1.247919  | -3.884197 |
| C | -1.289793 | 0.083226  | -3.887939 |
| C | -0.561500 | 1.333157  | -4.008240 |
| C | 0.775896  | 3.254832  | -2.380028 |
| C | -1.301156 | 3.607700  | -1.157583 |
| C | -0.668700 | 3.323083  | -2.414095 |
| C | -1.350312 | 2.381899  | -3.315587 |
| C | 1.508488  | 3.436494  | 1.278361  |
| C | 0.877418  | 3.816176  | 0.049131  |
| C | 1.529055  | 3.548360  | -1.167828 |
| C | -0.549936 | 3.827709  | 0.040831  |
| C | 1.441478  | -0.114433 | 3.803037  |
| C | -0.730152 | -1.305164 | 3.747031  |
| C | 0.685851  | -1.338686 | 3.789983  |
| C | -1.401432 | -2.342902 | 3.031697  |
| C | 2.699443  | -0.377576 | 3.116818  |
| C | 4.000138  | 0.249852  | 1.189347  |
| C | 3.344099  | 0.628118  | 2.383590  |
| C | 2.995981  | 2.096691  | 2.621242  |
| C | 2.647069  | -3.177265 | 0.677748  |
| C | 3.284113  | -2.121472 | 1.434913  |
| C | 2.678528  | -1.741993 | 2.667414  |
| C | 3.977659  | -1.113361 | 0.716192  |
| C | -0.649050 | -3.333294 | 2.304151  |
| C | 0.783426  | -3.350511 | 2.303648  |
| C | 1.439141  | -2.342721 | 3.080681  |
| C | 1.451253  | -3.872785 | 1.120717  |
| C | -1.408876 | -3.708184 | 1.128510  |
| C | -1.384311 | -3.673990 | -1.292984 |
| C | -0.761932 | -4.157488 | -0.085945 |
| C | 0.701065  | -4.325966 | -0.073359 |
| C | 4.037361  | 1.109561  | 0.027280  |
| C | 3.338626  | 2.357077  | 0.054425  |
| C | 2.750487  | 2.768244  | 1.279498  |
| C | 2.742860  | 2.797554  | -1.173390 |
| C | 0.751362  | 3.181637  | 2.477271  |
| C | -0.688723 | 3.279449  | 2.483901  |
| C | -1.310888 | 3.587995  | 1.215226  |
| C | -1.402032 | 2.302395  | 3.315253  |
| C | 1.627848  | 2.408470  | 3.474620  |
| C | -1.343549 | -0.010737 | 3.798358  |

|   |           |           |           |
|---|-----------|-----------|-----------|
| C | 0.838191  | 1.166177  | 3.865604  |
| C | -0.603621 | 1.233862  | 3.951505  |
| C | 4.020566  | 0.289661  | -1.144040 |
| C | 2.735830  | -0.306409 | -3.148197 |
| C | 3.353302  | 0.698654  | -2.346938 |
| C | 2.757134  | 1.995438  | -2.360896 |
| C | 2.650006  | -3.147524 | -0.757501 |
| C | 2.713288  | -1.677818 | -2.720904 |
| C | 3.299743  | -2.073277 | -1.478009 |
| C | -3.800497 | 1.043731  | -0.766922 |
| C | -0.611118 | -3.280669 | -2.456850 |
| C | 1.490828  | -2.278242 | -3.183364 |
| C | 0.816190  | -3.288153 | -2.424560 |
| C | 1.458498  | -3.820905 | -1.234424 |
| C | 1.515697  | -0.044269 | -3.876879 |
| C | 0.750888  | -1.268476 | -3.902440 |
| C | -0.666925 | -1.224264 | -3.860664 |
| C | -1.348557 | -2.271686 | -3.171809 |
| C | -3.719540 | 4.516955  | 1.177069  |
| C | -3.706491 | 4.542932  | -1.139860 |
| H | -4.731445 | 4.139050  | -1.279561 |
| H | -3.400807 | 5.056464  | -2.062573 |
| H | -3.422801 | 5.010418  | 2.113574  |
| H | -4.745993 | 4.110200  | 1.296227  |
| N | -3.566959 | 5.408639  | 0.029107  |
| H | -4.248356 | 6.169339  | 0.034061  |

isomer 3

|    |           |           |           |
|----|-----------|-----------|-----------|
| C  | -3.251443 | -2.926941 | 3.416901  |
| C  | -3.225211 | -4.298210 | 1.555209  |
| H  | -2.657732 | -5.128090 | 2.028494  |
| H  | -3.761831 | -4.688424 | 0.679319  |
| H  | -3.806620 | -2.203178 | 4.030783  |
| H  | -2.701470 | -3.617665 | 4.090149  |
| N  | -4.127206 | -3.606725 | 2.468699  |
| H  | -4.789948 | -4.237508 | 2.923138  |
| Sc | 0.887403  | -2.130934 | -0.485175 |
| Sc | 0.239177  | 1.100712  | 1.666589  |
| Sc | 0.182475  | 1.262043  | -1.876016 |
| C  | 1.246204  | 0.009479  | -0.022468 |
| C  | -0.047021 | -0.142018 | -0.197780 |
| C  | -2.284306 | 3.333020  | -0.952232 |
| C  | -2.640890 | 2.006867  | -1.589489 |
| C  | -2.025133 | 1.648613  | -2.836708 |
| C  | 4.545213  | -0.993180 | -0.926613 |

|   |           |           |           |
|---|-----------|-----------|-----------|
| C | -2.262958 | 3.334285  | 0.682850  |
| C | -1.970287 | 1.650310  | 2.568269  |
| C | -2.602899 | 2.012161  | 1.339010  |
| C | -3.220853 | 0.988919  | 0.615644  |
| C | -3.249090 | -0.387715 | -1.267257 |
| C | -2.594384 | -0.778519 | -2.461466 |
| C | -1.983527 | 0.259696  | -3.228809 |
| C | -1.992430 | -2.065903 | -2.497869 |
| C | -3.247287 | -1.244049 | -0.115673 |
| C | -2.208205 | -3.176956 | 1.164729  |
| C | -2.609751 | -2.489155 | -0.123640 |
| C | -1.988811 | -2.908843 | -1.331741 |
| C | -1.932599 | 0.260281  | 2.967321  |
| C | -2.574116 | -0.771234 | 2.233494  |
| C | -3.214293 | -0.382018 | 1.060446  |
| C | -2.206600 | -2.225715 | 2.490077  |
| C | 1.999868  | 2.293892  | -3.317720 |
| C | 1.353338  | 1.235756  | -4.054557 |
| C | -0.798079 | 0.031624  | -3.997876 |
| C | -0.096174 | 1.294710  | -4.141326 |
| C | 1.227736  | 3.297857  | -2.596167 |
| C | -0.835693 | 3.630316  | -1.338246 |
| C | -0.224190 | 3.344074  | -2.606947 |
| C | -0.892085 | 2.345487  | -3.461293 |
| C | 2.024192  | 3.628659  | 1.041521  |
| C | 1.360229  | 3.943598  | -0.171579 |
| C | 1.991407  | 3.621516  | -1.405059 |
| C | -0.072017 | 3.915136  | -0.157250 |
| C | 2.069146  | -0.023758 | 3.680516  |
| C | -0.099700 | -1.255230 | 3.658198  |
| C | 1.321608  | -1.256559 | 3.676968  |
| C | -0.770039 | -2.311399 | 2.992350  |
| C | 3.301893  | -0.259900 | 2.952601  |
| C | 4.568607  | 0.380796  | 0.962097  |
| C | 3.900885  | 0.768482  | 2.166571  |
| C | 3.279295  | 2.057070  | 2.204236  |
| C | 3.244905  | -3.045832 | 0.517379  |
| C | 3.883942  | -1.987341 | 1.259289  |
| C | 3.305077  | -1.620797 | 2.509348  |
| C | 4.563826  | -0.986059 | 0.515217  |
| C | -0.025016 | -3.225368 | 2.206363  |
| C | 1.413052  | -3.221274 | 2.176735  |
| C | 2.077585  | -2.238431 | 2.951523  |
| C | 2.049363  | -3.708878 | 0.976465  |
| C | -0.762677 | -3.672397 | 1.059945  |

|         |           |           |           |
|---------|-----------|-----------|-----------|
| C       | -0.797514 | -3.735698 | -1.371304 |
| C       | -0.143434 | -4.146156 | -0.134315 |
| C       | 1.325810  | -4.259264 | -0.171200 |
| C       | 4.542606  | 1.220113  | -0.206157 |
| C       | 3.846643  | 2.461597  | -0.195652 |
| C       | 3.253835  | 2.887269  | 1.035448  |
| C       | 3.214036  | 2.873202  | -1.414334 |
| C       | 1.278207  | 3.281378  | 2.232725  |
| C       | -0.165566 | 3.307533  | 2.265546  |
| C       | -0.811156 | 3.639719  | 1.027195  |
| C       | -0.822727 | 2.344077  | 3.160835  |
| C       | 2.065680  | 2.299881  | 2.957283  |
| C       | -0.734944 | 0.049252  | 3.739387  |
| C       | 1.432548  | 1.262074  | 3.734839  |
| C       | -0.026786 | 1.311276  | 3.872228  |
| C       | 4.535024  | 0.374523  | -1.373391 |
| C       | 3.238488  | -0.277123 | -3.343302 |
| C       | 3.840530  | 0.753352  | -2.560062 |
| C       | 3.217437  | 2.043467  | -2.583498 |
| C       | 3.248632  | -3.083626 | -0.915613 |
| C       | 3.252455  | -1.642239 | -2.898456 |
| C       | 3.864038  | -2.005955 | -1.661091 |
| C       | -3.244503 | 0.985370  | -0.841576 |
| C       | -0.038343 | -3.328173 | -2.541150 |
| C       | 2.025812  | -2.274277 | -3.321505 |
| C       | 1.401697  | -3.323333 | -2.559969 |
| C       | 2.081692  | -3.831822 | -1.371211 |
| C       | 2.001446  | -0.047344 | -4.049981 |
| C       | 1.260917  | -1.287277 | -4.048520 |
| C       | -0.154075 | -1.263789 | -3.975870 |
| C       | -0.795595 | -2.308308 | -3.243608 |
| C       | -3.245601 | 4.484451  | 1.035285  |
| C       | -3.272248 | 4.484109  | -1.282090 |
| H       | -4.284918 | 4.044053  | -1.404134 |
| H       | -2.995340 | 4.998480  | -2.213472 |
| H       | -2.948613 | 4.998320  | 1.960681  |
| H       | -4.254776 | 4.043543  | 1.179462  |
| N       | -3.145432 | 5.366662  | -0.124649 |
| H       | -3.850998 | 6.104872  | -0.116518 |
| isomer4 |           |           |           |
| C       | -0.808978 | 1.767623  | 5.707256  |
| C       | -2.049231 | -0.187927 | 5.599977  |
| H       | -1.364620 | -0.815593 | 6.210701  |
| H       | -3.043002 | -0.657191 | 5.590946  |

|    |           |           |           |
|----|-----------|-----------|-----------|
| H  | -0.812739 | 2.864501  | 5.787199  |
| H  | 0.026592  | 1.370237  | 6.323356  |
| N  | -2.115283 | 1.203678  | 6.038198  |
| H  | -2.333871 | 1.284155  | 7.032609  |
| Sc | 0.462278  | -2.102606 | 0.344522  |
| Sc | 0.153381  | 1.705297  | 1.258142  |
| Sc | -0.346618 | 1.022590  | -1.863700 |
| C  | 0.748697  | 0.004653  | -0.219184 |
| C  | -0.521802 | -0.146975 | 0.107164  |
| C  | -2.737015 | 3.340598  | -0.792152 |
| C  | -3.128205 | 2.044438  | -1.477319 |
| C  | -2.511822 | 1.698597  | -2.729872 |
| C  | 4.021572  | -1.047617 | -0.767073 |
| C  | -2.731005 | 3.312978  | 0.843726  |
| C  | -2.412894 | 1.540937  | 2.631057  |
| C  | -3.070338 | 1.968931  | 1.436497  |
| C  | -3.747227 | 0.999186  | 0.697548  |
| C  | -3.803110 | -0.335080 | -1.215797 |
| C  | -3.129752 | -0.721788 | -2.404556 |
| C  | -2.493633 | 0.321484  | -3.158662 |
| C  | -2.550369 | -2.026257 | -2.456878 |
| C  | -3.816481 | -1.196326 | -0.060299 |
| C  | -2.566483 | -2.919429 | 1.143818  |
| C  | -3.168198 | -2.461390 | -0.078426 |
| C  | -2.556250 | -2.872750 | -1.300056 |
| C  | -2.498981 | 0.208944  | 3.096329  |
| C  | -3.113916 | -0.786029 | 2.304502  |
| C  | -3.769552 | -0.367892 | 1.112484  |
| C  | -2.564006 | -2.116670 | 2.321611  |
| C  | 1.546928  | 2.290150  | -3.127386 |
| C  | 0.891018  | 1.278195  | -3.918578 |
| C  | -1.295380 | 0.094917  | -3.928110 |
| C  | -0.566684 | 1.354273  | -4.050088 |
| C  | 0.780298  | 3.263962  | -2.374737 |
| C  | -1.285342 | 3.606410  | -1.139188 |
| C  | -0.659316 | 3.294029  | -2.384866 |
| C  | -1.343656 | 2.376555  | -3.303336 |
| C  | 1.551329  | 3.647777  | 1.284124  |
| C  | 0.900663  | 3.929944  | 0.036610  |
| C  | 1.544121  | 3.601108  | -1.195405 |
| C  | -0.536998 | 3.913469  | 0.046814  |
| C  | 1.471347  | -0.116709 | 3.797172  |
| C  | -0.688765 | -1.346948 | 3.780051  |
| C  | 0.708181  | -1.357095 | 3.788657  |
| C  | -1.336069 | -2.361437 | 3.033852  |

|   |           |           |           |
|---|-----------|-----------|-----------|
| C | 2.702480  | -0.366496 | 3.093340  |
| C | 4.013557  | 0.290899  | 1.136959  |
| C | 3.319700  | 0.657999  | 2.323682  |
| C | 2.699464  | 1.945496  | 2.364482  |
| C | 2.699818  | -3.162947 | 0.651681  |
| C | 3.321814  | -2.086832 | 1.399064  |
| C | 2.704311  | -1.723808 | 2.634310  |
| C | 4.011911  | -1.073596 | 0.673715  |
| C | -0.586158 | -3.366433 | 2.297950  |
| C | 0.850987  | -3.404219 | 2.308593  |
| C | 1.471955  | -2.344547 | 3.050291  |
| C | 1.529694  | -3.906515 | 1.110951  |
| C | -1.356149 | -3.725564 | 1.126746  |
| C | -1.337788 | -3.653223 | -1.307372 |
| C | -0.712558 | -4.124516 | -0.101663 |
| C | 0.746883  | -4.272926 | -0.093018 |
| C | 4.031590  | 1.153871  | -0.015093 |
| C | 3.356878  | 2.404784  | -0.004351 |
| C | 2.727191  | 2.809301  | 1.227397  |
| C | 2.770032  | 2.860711  | -1.224920 |
| C | 0.811524  | 3.368795  | 2.527577  |
| C | -0.664156 | 3.325536  | 2.503111  |
| C | -1.288462 | 3.668542  | 1.232442  |
| C | -1.255880 | 2.205161  | 3.184104  |
| C | 1.508453  | 2.232828  | 3.146450  |
| C | -1.455260 | -0.081615 | 4.161676  |
| C | 0.855844  | 1.155265  | 3.835198  |
| C | -0.594236 | 1.309186  | 4.243949  |
| C | 4.042459  | 0.324594  | -1.196690 |
| C | 2.742878  | -0.273882 | -3.181284 |
| C | 3.367807  | 0.735237  | -2.384794 |
| C | 2.769104  | 2.034817  | -2.400798 |
| C | 2.676807  | -3.095924 | -0.784776 |
| C | 2.729276  | -1.645157 | -2.756285 |
| C | 3.321400  | -2.033874 | -1.519281 |
| C | -3.776065 | 1.029906  | -0.766282 |
| C | -0.586656 | -3.269650 | -2.485071 |
| C | 1.506262  | -2.254474 | -3.220120 |
| C | 0.834985  | -3.250233 | -2.453373 |
| C | 1.471035  | -3.734749 | -1.243915 |
| C | 1.518754  | -0.015216 | -3.901909 |
| C | 0.757891  | -1.246382 | -3.925110 |
| C | -0.662882 | -1.209853 | -3.882874 |
| C | -1.335732 | -2.266097 | -3.192312 |
| C | -3.737363 | 4.439839  | 1.205012  |

|   |           |          |           |
|---|-----------|----------|-----------|
| C | -3.698365 | 4.521650 | -1.112352 |
| H | -4.709699 | 4.097579 | -1.286821 |
| H | -3.384341 | 5.065937 | -2.014256 |
| H | -3.471125 | 4.925828 | 2.154512  |
| H | -4.746121 | 3.985523 | 1.305251  |
| N | -3.607887 | 5.361421 | 0.078637  |
| H | -4.316606 | 6.096562 | 0.092140  |

isomer5

|    |           |           |           |
|----|-----------|-----------|-----------|
| C  | 2.810517  | -3.698009 | 4.463841  |
| C  | 1.614739  | -2.084766 | 5.621488  |
| H  | 0.754293  | -2.728778 | 5.904750  |
| H  | 1.642244  | -1.217050 | 6.296105  |
| H  | 3.792877  | -4.123956 | 4.214002  |
| H  | 2.088643  | -4.530764 | 4.609582  |
| N  | 2.895624  | -2.785648 | 5.599266  |
| H  | 3.089694  | -3.273177 | 6.475196  |
| Sc | 1.155415  | -2.400674 | -0.008960 |
| Sc | 0.391774  | 0.860532  | 1.728277  |
| Sc | 0.372563  | 0.935922  | -1.840848 |
| C  | 1.375358  | -0.175480 | -0.057533 |
| C  | 0.100134  | -0.484671 | -0.125028 |
| C  | -2.074785 | 3.106108  | -0.936002 |
| C  | -2.449339 | 1.790087  | -1.581344 |
| C  | -1.821200 | 1.416010  | -2.816724 |
| C  | 4.675826  | -1.341787 | -0.792608 |
| C  | -2.082556 | 3.109155  | 0.700661  |
| C  | -1.845464 | 1.425424  | 2.590950  |
| C  | -2.465890 | 1.795703  | 1.348742  |
| C  | -3.108217 | 0.793335  | 0.613639  |
| C  | -3.133493 | -0.584224 | -1.276670 |
| C  | -2.452213 | -0.999070 | -2.450410 |
| C  | -1.800017 | 0.024373  | -3.203993 |
| C  | -1.877160 | -2.309291 | -2.484356 |
| C  | -3.161629 | -1.428664 | -0.109616 |
| C  | -1.886695 | -3.122527 | 1.108678  |
| C  | -2.507427 | -2.699117 | -0.107063 |
| C  | -1.893984 | -3.143567 | -1.319904 |
| C  | -1.822391 | 0.040612  | 2.983410  |
| C  | -2.465431 | -0.980469 | 2.227976  |
| C  | -3.143100 | -0.580677 | 1.047101  |
| C  | -1.869985 | -2.276780 | 2.261967  |
| C  | 2.228094  | 1.991077  | -3.225153 |
| C  | 1.572348  | 0.948701  | -3.977308 |
| C  | -0.603012 | -0.221865 | -3.956301 |

|   |           |           |           |
|---|-----------|-----------|-----------|
| C | 0.123319  | 1.028483  | -4.093975 |
| C | 1.463889  | 3.000297  | -2.512239 |
| C | -0.614833 | 3.371103  | -1.291239 |
| C | 0.012299  | 3.062312  | -2.542841 |
| C | -0.662781 | 2.088460  | -3.416266 |
| C | 2.207824  | 3.327124  | 1.129977  |
| C | 1.570846  | 3.656311  | -0.092726 |
| C | 2.216740  | 3.321079  | -1.313635 |
| C | 0.132977  | 3.649597  | -0.099553 |
| C | 2.131940  | -0.341345 | 3.782862  |
| C | -0.017924 | -1.497754 | 3.736801  |
| C | 1.427548  | -1.646961 | 4.142349  |
| C | -0.651869 | -2.497970 | 2.988033  |
| C | 3.306538  | -0.613945 | 3.012089  |
| C | 4.666292  | 0.022545  | 1.085692  |
| C | 3.971821  | 0.413813  | 2.255421  |
| C | 3.394486  | 1.715406  | 2.294484  |
| C | 3.357368  | -3.429556 | 0.642502  |
| C | 3.946411  | -2.335581 | 1.391807  |
| C | 3.362884  | -1.971203 | 2.631334  |
| C | 4.650803  | -1.341333 | 0.645625  |
| C | 0.106332  | -3.515473 | 2.257877  |
| C | 1.503772  | -3.595893 | 2.281170  |
| C | 2.278244  | -2.787054 | 3.319478  |
| C | 2.164034  | -4.118918 | 1.101602  |
| C | -0.679472 | -3.919670 | 1.103608  |
| C | -0.685498 | -3.941398 | -1.316382 |
| C | -0.051697 | -4.394276 | -0.100349 |
| C | 1.404988  | -4.570151 | -0.093998 |
| C | 4.700582  | 0.873610  | -0.082547 |
| C | 4.034455  | 2.128836  | -0.082906 |
| C | 3.419207  | 2.560288  | 1.136476  |
| C | 3.429504  | 2.554837  | -1.309867 |
| C | 1.436074  | 2.993478  | 2.315509  |
| C | -0.011727 | 3.050971  | 2.322550  |
| C | -0.630207 | 3.392308  | 1.070183  |
| C | -0.695495 | 2.099336  | 3.203791  |
| C | 2.185206  | 1.983967  | 3.037635  |
| C | -0.632750 | -0.202917 | 3.758226  |
| C | 1.531622  | 0.948466  | 3.812576  |
| C | 0.070029  | 1.062069  | 3.938777  |
| C | 4.704046  | 0.028847  | -1.243451 |
| C | 3.418417  | -0.598937 | -3.226480 |
| C | 4.037881  | 0.421948  | -2.444695 |
| C | 3.436026  | 1.721386  | -2.475273 |



|   |           |           |           |
|---|-----------|-----------|-----------|
| C | 3.352291  | -3.408674 | -0.793922 |
| C | 3.401908  | -1.964944 | -2.783823 |
| C | 3.987031  | -2.338976 | -1.536240 |
| C | -3.101710 | 0.788180  | -0.850017 |
| C | 0.080432  | -3.563558 | -2.485025 |
| C | 2.178971  | -2.577493 | -3.239419 |
| C | 1.511121  | -3.573469 | -2.464333 |
| C | 2.156615  | -4.086208 | -1.263038 |
| C | 2.195392  | -0.346139 | -3.952345 |
| C | 1.433543  | -1.571788 | -3.963099 |
| C | 0.017263  | -1.527060 | -3.919966 |
| C | -0.662031 | -2.564573 | -3.209362 |
| C | -3.050681 | 4.278583  | 1.033262  |
| C | -3.032670 | 4.277576  | -1.282732 |
| H | -4.051863 | 3.858204  | -1.421121 |
| H | -2.730203 | 4.784321  | -2.210284 |
| H | -2.763038 | 4.786263  | 1.965121  |
| H | -4.071047 | 3.857095  | 1.155004  |
| N | -2.907686 | 5.158238  | -0.123787 |
| H | -3.598083 | 5.910648  | -0.128843 |

isomer6

|    |           |           |           |
|----|-----------|-----------|-----------|
| C  | -1.975468 | -5.377374 | 1.851195  |
| C  | -3.908180 | -4.098050 | 1.788259  |
| H  | -4.342346 | -4.562692 | 0.876678  |
| H  | -4.713658 | -3.606727 | 2.352342  |
| H  | -1.227134 | -5.893740 | 2.469483  |
| H  | -2.189631 | -6.001330 | 0.955790  |
| N  | -3.161259 | -5.030064 | 2.628048  |
| H  | -3.713674 | -5.849991 | 2.883416  |
| Sc | 0.579292  | -2.052226 | 0.330893  |
| Sc | -0.283814 | 1.348677  | 1.686200  |
| Sc | -0.320874 | 1.149086  | -1.802091 |
| C  | 0.756339  | 0.148747  | -0.099090 |
| C  | -0.512407 | -0.169044 | 0.031143  |
| C  | -2.747999 | 3.406055  | -0.822423 |
| C  | -3.124105 | 2.084816  | -1.462166 |
| C  | -2.510311 | 1.714906  | -2.708628 |
| C  | 4.055627  | -1.001212 | -0.733250 |
| C  | -2.746630 | 3.419473  | 0.813224  |
| C  | -2.479398 | 1.738104  | 2.693806  |
| C  | -3.108344 | 2.102701  | 1.463329  |
| C  | -3.760523 | 1.083105  | 0.742139  |
| C  | -3.787726 | -0.290029 | -1.143976 |
| C  | -3.120886 | -0.697143 | -2.323188 |

|   |           |           |           |
|---|-----------|-----------|-----------|
| C | -2.486848 | 0.326958  | -3.099443 |
| C | -2.534439 | -1.996257 | -2.335816 |
| C | -3.815772 | -1.138917 | 0.019276  |
| C | -2.822024 | -3.075150 | 1.345248  |
| C | -3.180208 | -2.401543 | 0.028210  |
| C | -2.541329 | -2.809653 | -1.152807 |
| C | -2.450125 | 0.345919  | 3.079568  |
| C | -3.100181 | -0.696798 | 2.345991  |
| C | -3.805538 | -0.279588 | 1.180835  |
| C | -2.546877 | -2.004286 | 2.397260  |
| C | 1.544267  | 2.301999  | -3.144120 |
| C | 0.884735  | 1.264786  | -3.897379 |
| C | -1.291541 | 0.084246  | -3.858982 |
| C | -0.570890 | 1.339922  | -4.018049 |
| C | 0.774929  | 3.295812  | -2.418085 |
| C | -1.294672 | 3.683016  | -1.187727 |
| C | -0.669051 | 3.343673  | -2.434756 |
| C | -1.353089 | 2.387077  | -3.314197 |
| C | 1.544573  | 3.653878  | 1.202750  |
| C | 0.899491  | 3.975504  | -0.023526 |
| C | 1.542708  | 3.645528  | -1.241256 |
| C | -0.535782 | 3.957314  | -0.015755 |
| C | 1.546622  | 0.000056  | 3.856923  |
| C | -0.630127 | -1.174524 | 3.759819  |
| C | 0.774899  | -1.221845 | 3.822179  |
| C | -1.299173 | -2.206551 | 3.008564  |
| C | 2.767682  | -0.252913 | 3.137634  |
| C | 4.054528  | 0.371102  | 1.151320  |
| C | 3.377347  | 0.764240  | 2.343445  |
| C | 2.765896  | 2.062333  | 2.368010  |
| C | 2.755962  | -3.105348 | 0.738898  |
| C | 3.368878  | -2.005804 | 1.452111  |
| C | 2.752402  | -1.619925 | 2.687262  |
| C | 4.051438  | -1.000548 | 0.708868  |
| C | -0.563434 | -3.255066 | 2.348987  |
| C | 0.861127  | -3.284271 | 2.367044  |
| C | 1.520437  | -2.226434 | 3.104154  |
| C | 1.574724  | -3.840760 | 1.214286  |
| C | -1.452658 | -4.003853 | 1.359253  |
| C | -1.294525 | -3.575772 | -1.129494 |
| C | -0.676408 | -4.074868 | 0.043484  |
| C | 0.778489  | -4.225996 | 0.032332  |
| C | 4.052235  | 1.211631  | -0.018743 |
| C | 3.371963  | 2.463719  | -0.024732 |
| C | 2.758774  | 2.889373  | 1.197828  |

|         |           |           |           |
|---------|-----------|-----------|-----------|
| C       | 2.765309  | 2.889138  | -1.248209 |
| C       | 0.793311  | 3.349570  | 2.406519  |
| C       | -0.661871 | 3.417814  | 2.441811  |
| C       | -1.288060 | 3.702415  | 1.177635  |
| C       | -1.327793 | 2.424879  | 3.298644  |
| C       | 1.562513  | 2.336083  | 3.117348  |
| C       | -1.257268 | 0.112966  | 3.822900  |
| C       | 0.909884  | 1.288317  | 3.861362  |
| C       | -0.533663 | 1.366542  | 3.964174  |
| C       | 4.059573  | 0.368920  | -1.184472 |
| C       | 2.751110  | -0.268713 | -3.146735 |
| C       | 3.376160  | 0.756824  | -2.375476 |
| C       | 2.766078  | 2.052549  | -2.410639 |
| C       | 2.722517  | -3.060166 | -0.697037 |
| C       | 2.747690  | -1.631568 | -2.697648 |
| C       | 3.356306  | -2.001751 | -1.457200 |
| C       | -3.762139 | 1.081667  | -0.720407 |
| C       | -0.563354 | -3.218154 | -2.321664 |
| C       | 1.520229  | -2.246232 | -3.131085 |
| C       | 0.857655  | -3.222709 | -2.326303 |
| C       | 1.506712  | -3.707735 | -1.133381 |
| C       | 1.517848  | -0.025422 | -3.862070 |
| C       | 0.761421  | -1.256338 | -3.847615 |
| C       | -0.657669 | -1.217656 | -3.792342 |
| C       | -1.322043 | -2.245778 | -3.060791 |
| C       | -3.716219 | 4.585113  | 1.144496  |
| C       | -3.714395 | 4.571389  | -1.171746 |
| H       | -4.732372 | 4.146709  | -1.301512 |
| H       | -3.419041 | 5.073815  | -2.103997 |
| H       | -3.426041 | 5.100090  | 2.071415  |
| H       | -4.733400 | 4.158438  | 1.276087  |
| N       | -3.586296 | 5.459028  | -0.018815 |
| H       | -4.278848 | 6.209439  | -0.024675 |
| isomer7 |           |           |           |
| C       | -0.846435 | 1.738722  | 5.776099  |
| C       | -2.041740 | 3.351263  | 4.633912  |
| H       | -3.045408 | 2.965834  | 4.912642  |
| H       | -2.133633 | 4.406984  | 4.341832  |
| H       | 0.025874  | 1.490039  | 6.396029  |
| H       | -1.732213 | 1.194837  | 6.165578  |
| N       | -1.031972 | 3.176621  | 5.664774  |
| H       | -1.291953 | 3.613163  | 6.550785  |
| Sc      | 0.466382  | -2.111359 | -0.328956 |
| Sc      | -0.400308 | 0.999238  | 1.920385  |

|    |           |           |           |
|----|-----------|-----------|-----------|
| Sc | -0.202006 | 1.266202  | -1.747054 |
| C  | 0.660576  | 0.127979  | 0.117918  |
| C  | -0.607965 | -0.203772 | 0.045918  |
| C  | -2.761846 | 3.354942  | -0.832273 |
| C  | -3.122205 | 2.044447  | -1.489283 |
| C  | -2.481374 | 1.683519  | -2.713979 |
| C  | 4.021401  | -1.050394 | -0.728605 |
| C  | -2.774847 | 3.334907  | 0.801483  |
| C  | -2.557042 | 1.647066  | 2.691388  |
| C  | -3.145908 | 2.010486  | 1.441910  |
| C  | -3.791299 | 1.021741  | 0.688086  |
| C  | -3.789842 | -0.335249 | -1.209472 |
| C  | -3.114183 | -0.729694 | -2.392904 |
| C  | -2.462550 | 0.302618  | -3.130607 |
| C  | -2.532384 | -2.036499 | -2.439421 |
| C  | -3.830339 | -1.194247 | -0.056638 |
| C  | -2.571167 | -2.903733 | 1.145021  |
| C  | -3.172417 | -2.459576 | -0.068747 |
| C  | -2.557979 | -2.888701 | -1.289510 |
| C  | -2.508799 | 0.261860  | 3.094307  |
| C  | -3.135430 | -0.763433 | 2.292878  |
| C  | -3.805215 | -0.355144 | 1.110825  |
| C  | -2.560623 | -2.072948 | 2.312240  |
| C  | 1.554479  | 2.300378  | -3.134406 |
| C  | 0.907653  | 1.256081  | -3.897290 |
| C  | -1.263180 | 0.071617  | -3.880366 |
| C  | -0.539182 | 1.323786  | -4.000505 |
| C  | 0.781001  | 3.307609  | -2.410455 |
| C  | -1.303854 | 3.640612  | -1.183837 |
| C  | -0.671079 | 3.357106  | -2.441173 |
| C  | -1.328519 | 2.368865  | -3.304465 |
| C  | 1.499613  | 3.566451  | 1.249799  |
| C  | 0.866728  | 3.907656  | 0.031326  |
| C  | 1.520863  | 3.598261  | -1.198257 |
| C  | -0.562555 | 3.904152  | 0.010180  |
| C  | 1.468083  | -0.115157 | 3.841305  |
| C  | -0.697518 | -1.299211 | 3.774985  |
| C  | 0.723547  | -1.356906 | 3.856661  |
| C  | -1.356487 | -2.337538 | 3.050494  |
| C  | 2.699033  | -0.353701 | 3.119712  |
| C  | 4.019537  | 0.300661  | 1.173510  |
| C  | 3.321461  | 0.678207  | 2.363105  |
| C  | 2.711141  | 1.968448  | 2.409939  |
| C  | 2.676586  | -3.115458 | 0.665319  |
| C  | 3.309169  | -2.069100 | 1.430884  |

|   |           |           |           |
|---|-----------|-----------|-----------|
| C | 2.700592  | -1.712662 | 2.671937  |
| C | 4.011771  | -1.062226 | 0.713822  |
| C | -0.606551 | -3.326070 | 2.329609  |
| C | 0.817876  | -3.316444 | 2.312928  |
| C | 1.474527  | -2.332088 | 3.112049  |
| C | 1.467652  | -3.775220 | 1.102264  |
| C | -1.350986 | -3.684306 | 1.140728  |
| C | -1.346146 | -3.681585 | -1.287917 |
| C | -0.711325 | -4.125896 | -0.068492 |
| C | 0.748357  | -4.279436 | -0.070403 |
| C | 4.024115  | 1.154254  | 0.017176  |
| C | 3.337850  | 2.401818  | 0.032321  |
| C | 2.721995  | 2.815059  | 1.255849  |
| C | 2.732500  | 2.834685  | -1.193028 |
| C | 0.723071  | 3.213923  | 2.424459  |
| C | -0.708684 | 3.266077  | 2.403612  |
| C | -1.328184 | 3.618833  | 1.174955  |
| C | -1.523162 | 2.486382  | 3.450977  |
| C | 1.486873  | 2.209055  | 3.151381  |
| C | -1.340947 | -0.012666 | 3.879437  |
| C | 0.857287  | 1.170506  | 3.905994  |
| C | -0.626142 | 1.276173  | 4.307175  |
| C | 4.034047  | 0.323974  | -1.161069 |
| C | 2.761891  | -0.289887 | -3.159342 |
| C | 3.362698  | 0.722765  | -2.352883 |
| C | 2.749057  | 2.019652  | -2.372123 |
| C | 2.703953  | -3.132283 | -0.770291 |
| C | 2.753326  | -1.658246 | -2.729262 |
| C | 3.342748  | -2.045314 | -1.487212 |
| C | -3.772622 | 1.033769  | -0.766441 |
| C | -0.566044 | -3.287187 | -2.445870 |
| C | 1.525922  | -2.269280 | -3.179981 |
| C | 0.870806  | -3.312551 | -2.439353 |
| C | 1.532183  | -3.852767 | -1.255237 |
| C | 1.538515  | -0.036595 | -3.884367 |
| C | 0.780573  | -1.263636 | -3.901252 |
| C | -0.638364 | -1.227372 | -3.858091 |
| C | -1.311851 | -2.272834 | -3.158803 |
| C | -3.756666 | 4.491292  | 1.144834  |
| C | -3.728622 | 4.520840  | -1.170839 |
| H | -4.742176 | 4.093440  | -1.322483 |
| H | -3.425043 | 5.043604  | -2.088932 |
| H | -3.477690 | 4.995280  | 2.081596  |
| H | -4.772413 | 4.057398  | 1.260908  |
| N | -3.622138 | 5.388648  | 0.000258  |

|         |           |           |           |
|---------|-----------|-----------|-----------|
| H       | -4.326462 | 6.128235  | 0.001964  |
| isomer8 |           |           |           |
| C       | 4.040650  | 4.136168  | 1.704704  |
| C       | 2.091178  | 5.385027  | 1.650155  |
| H       | 1.988374  | 5.526778  | 2.747900  |
| H       | 1.495962  | 6.155243  | 1.138108  |
| H       | 5.021502  | 3.928016  | 1.255286  |
| H       | 4.142949  | 4.117434  | 2.809875  |
| N       | 3.471285  | 5.373105  | 1.184810  |
| H       | 3.996741  | 6.202905  | 1.464991  |
| Sc      | 0.408524  | -2.134555 | 0.285087  |
| Sc      | -0.374008 | 1.429795  | 1.499785  |
| Sc      | -0.366128 | 1.043038  | -1.835546 |
| C       | 0.657415  | 0.034486  | -0.056979 |
| C       | -0.636855 | -0.214806 | 0.004870  |
| C       | -2.798577 | 3.318668  | -0.818961 |
| C       | -3.189013 | 2.007578  | -1.480214 |
| C       | -2.564563 | 1.640826  | -2.723153 |
| C       | 3.979849  | -1.054567 | -0.750727 |
| C       | -2.822060 | 3.340811  | 0.816274  |
| C       | -2.552440 | 1.647246  | 2.676768  |
| C       | -3.190176 | 2.014545  | 1.449541  |
| C       | -3.830578 | 1.004617  | 0.713688  |
| C       | -3.850582 | -0.372302 | -1.183171 |
| C       | -3.176382 | -0.774505 | -2.366525 |
| C       | -2.539735 | 0.256436  | -3.129491 |
| C       | -2.589512 | -2.077601 | -2.402165 |
| C       | -3.867701 | -1.217666 | -0.020679 |
| C       | -2.593322 | -2.922134 | 1.194244  |
| C       | -3.206788 | -2.482762 | -0.021625 |
| C       | -2.592144 | -2.909690 | -1.238874 |
| C       | -2.529169 | 0.256392  | 3.074298  |
| C       | -3.168414 | -0.772354 | 2.320501  |
| C       | -3.846980 | -0.369606 | 1.143015  |
| C       | -2.575351 | -2.078007 | 2.350797  |
| C       | 1.494726  | 2.237363  | -3.136665 |
| C       | 0.839272  | 1.212313  | -3.916150 |
| C       | -1.338700 | 0.025461  | -3.890295 |
| C       | -0.620725 | 1.283808  | -4.037211 |
| C       | 0.717388  | 3.201292  | -2.385457 |
| C       | -1.337218 | 3.547568  | -1.159495 |
| C       | -0.721504 | 3.250966  | -2.409659 |
| C       | -1.406435 | 2.315489  | -3.316181 |
| C       | 1.595612  | 3.945791  | 1.312894  |

|   |           |           |           |
|---|-----------|-----------|-----------|
| C | 0.844051  | 3.874191  | 0.009683  |
| C | 1.475966  | 3.539627  | -1.196537 |
| C | -0.575581 | 3.823588  | 0.021574  |
| C | 1.480831  | -0.089537 | 3.820564  |
| C | -0.693508 | -1.276628 | 3.782157  |
| C | 0.722390  | -1.317591 | 3.838938  |
| C | -1.358704 | -2.321757 | 3.070954  |
| C | 2.701852  | -0.325564 | 3.107688  |
| C | 4.005427  | 0.310058  | 1.140313  |
| C | 3.297779  | 0.707742  | 2.318168  |
| C | 2.716950  | 2.003847  | 2.352153  |
| C | 2.674303  | -3.146688 | 0.702707  |
| C | 3.300871  | -2.065934 | 1.435247  |
| C | 2.702050  | -1.689679 | 2.670228  |
| C | 3.983667  | -1.052120 | 0.694466  |
| C | -0.610123 | -3.336640 | 2.362055  |
| C | 0.830644  | -3.358724 | 2.362287  |
| C | 1.471175  | -2.312134 | 3.109899  |
| C | 1.501724  | -3.880506 | 1.175232  |
| C | -1.382809 | -3.721491 | 1.193909  |
| C | -1.370059 | -3.690263 | -1.235014 |
| C | -0.738300 | -4.149502 | -0.026811 |
| C | 0.724846  | -4.295939 | -0.019908 |
| C | 3.984204  | 1.158856  | -0.026803 |
| C | 3.335477  | 2.412054  | -0.029242 |
| C | 2.969417  | 3.067826  | 1.300417  |
| C | 2.727807  | 2.821555  | -1.230573 |
| C | 0.732617  | 3.305173  | 2.415114  |
| C | -0.720960 | 3.369051  | 2.468361  |
| C | -1.365152 | 3.638626  | 1.204455  |
| C | -1.384956 | 2.322681  | 3.262215  |
| C | 1.494582  | 2.241320  | 3.030799  |
| C | -1.326279 | 0.013763  | 3.809376  |
| C | 0.841932  | 1.187039  | 3.781704  |
| C | -0.593004 | 1.258316  | 3.890886  |
| C | 3.986000  | 0.308757  | -1.195320 |
| C | 2.698272  | -0.325308 | -3.173086 |
| C | 3.317286  | 0.696144  | -2.388932 |
| C | 2.713001  | 1.990052  | -2.405949 |
| C | 2.651493  | -3.111599 | -0.733206 |
| C | 2.692709  | -1.688536 | -2.730340 |
| C | 3.289646  | -2.055074 | -1.485503 |
| C | -3.827297 | 1.001509  | -0.748661 |
| C | -0.618043 | -3.310904 | -2.412872 |
| C | 1.468745  | -2.306568 | -3.176548 |

|   |           |           |           |
|---|-----------|-----------|-----------|
| C | 0.804697  | -3.296826 | -2.392296 |
| C | 1.448750  | -3.771091 | -1.181446 |
| C | 1.468878  | -0.077463 | -3.891714 |
| C | 0.713474  | -1.313423 | -3.894689 |
| C | -0.704812 | -1.279512 | -3.845211 |
| C | -1.373268 | -2.321284 | -3.135241 |
| C | -3.804814 | 4.499268  | 1.126769  |
| C | -3.731949 | 4.504374  | -1.188691 |
| H | -4.750756 | 4.095410  | -1.354767 |
| H | -3.401841 | 5.009141  | -2.107950 |
| H | -3.542668 | 5.006117  | 2.066387  |
| H | -4.827496 | 4.075946  | 1.220078  |
| N | -3.632291 | 5.383541  | -0.025449 |
| H | -4.326198 | 6.132796  | -0.047179 |

isomer9

|    |           |           |           |
|----|-----------|-----------|-----------|
| C  | 3.889478  | 4.264862  | 1.757947  |
| C  | 3.865040  | 2.901449  | 3.624280  |
| H  | 4.871731  | 2.459098  | 3.470893  |
| H  | 3.576974  | 2.763466  | 4.676754  |
| H  | 3.615318  | 5.228029  | 1.304491  |
| H  | 4.902067  | 3.976421  | 1.403711  |
| N  | 3.761463  | 4.298266  | 3.212925  |
| H  | 4.473269  | 4.884405  | 3.652412  |
| Sc | 0.398435  | -2.141408 | -0.010805 |
| Sc | -0.362302 | 1.161790  | 1.745355  |
| Sc | -0.329641 | 1.224315  | -1.758263 |
| C  | 0.650044  | 0.079369  | -0.003140 |
| C  | -0.634228 | -0.212260 | -0.033262 |
| C  | -2.816905 | 3.344720  | -0.845649 |
| C  | -3.172057 | 2.028032  | -1.503381 |
| C  | -2.532657 | 1.671483  | -2.736173 |
| C  | 3.959605  | -0.999305 | -0.675220 |
| C  | -2.834043 | 3.334993  | 0.787834  |
| C  | -2.590013 | 1.641666  | 2.666260  |
| C  | -3.206081 | 2.013035  | 1.423133  |
| C  | -3.830683 | 1.007185  | 0.678168  |
| C  | -3.827244 | -0.356876 | -1.217820 |
| C  | -3.141169 | -0.754347 | -2.392551 |
| C  | -2.496036 | 0.283407  | -3.136336 |
| C  | -2.551632 | -2.058070 | -2.425589 |
| C  | -3.863511 | -1.211791 | -0.057948 |
| C  | -2.597868 | -2.910949 | 1.166628  |
| C  | -3.199595 | -2.475649 | -0.055007 |
| C  | -2.571979 | -2.902092 | -1.266686 |



|   |           |           |           |
|---|-----------|-----------|-----------|
| C | -2.570893 | 0.252960  | 3.064970  |
| C | -3.191587 | -0.776999 | 2.294461  |
| C | -3.850510 | -0.370045 | 1.102974  |
| C | -2.606013 | -2.080510 | 2.333187  |
| C | 1.506544  | 2.303024  | -3.112120 |
| C | 0.871041  | 1.257768  | -3.879512 |
| C | -1.292001 | 0.056918  | -3.879279 |
| C | -0.578640 | 1.318739  | -4.007976 |
| C | 0.733153  | 3.310137  | -2.397891 |
| C | -1.358070 | 3.630052  | -1.191202 |
| C | -0.720191 | 3.343522  | -2.447884 |
| C | -1.377364 | 2.364457  | -3.324204 |
| C | 1.456451  | 3.627594  | 1.253493  |
| C | 0.822767  | 3.911236  | 0.032252  |
| C | 1.478836  | 3.647678  | -1.208196 |
| C | -0.614591 | 3.878043  | 0.000153  |
| C | 1.419415  | -0.064576 | 3.888038  |
| C | -0.748135 | -1.280183 | 3.804397  |
| C | 0.671711  | -1.297461 | 3.866265  |
| C | -1.396852 | -2.319846 | 3.075711  |
| C | 2.647623  | -0.289335 | 3.155598  |
| C | 3.932441  | 0.355881  | 1.226211  |
| C | 3.278074  | 0.729661  | 2.408857  |
| C | 2.879656  | 2.177486  | 2.656613  |
| C | 2.656660  | -3.099009 | 0.727826  |
| C | 3.268234  | -2.025835 | 1.482336  |
| C | 2.649812  | -1.656429 | 2.710017  |
| C | 3.948063  | -1.010398 | 0.764852  |
| C | -0.631862 | -3.310270 | 2.358507  |
| C | 0.796844  | -3.299634 | 2.358659  |
| C | 1.437004  | -2.289028 | 3.148612  |
| C | 1.472247  | -3.807865 | 1.173051  |
| C | -1.375807 | -3.693236 | 1.174133  |
| C | -1.349471 | -3.679702 | -1.248735 |
| C | -0.725749 | -4.148179 | -0.032535 |
| C | 0.741471  | -4.295860 | -0.017874 |
| C | 3.932026  | 1.214671  | 0.047208  |
| C | 3.291681  | 2.459899  | 0.039821  |
| C | 2.895608  | 3.138052  | 1.344620  |
| C | 2.687090  | 2.865627  | -1.177476 |
| C | 0.694885  | 3.240553  | 2.403307  |
| C | -0.765273 | 3.287562  | 2.417966  |
| C | -1.381747 | 3.608775  | 1.165797  |
| C | -1.448568 | 2.322660  | 3.283956  |
| C | 1.433300  | 2.277109  | 3.160672  |

|         |           |           |           |
|---------|-----------|-----------|-----------|
| C       | -1.382582 | 0.019394  | 3.833326  |
| C       | 0.781759  | 1.226139  | 3.884060  |
| C       | -0.671699 | 1.276892  | 3.982418  |
| C       | 3.966921  | 0.368672  | -1.117439 |
| C       | 2.730483  | -0.274003 | -3.125793 |
| C       | 3.317351  | 0.751952  | -2.323785 |
| C       | 2.703525  | 2.038957  | -2.351106 |
| C       | 2.672139  | -3.089533 | -0.706172 |
| C       | 2.729727  | -1.638019 | -2.687381 |
| C       | 3.306936  | -2.009815 | -1.434780 |
| C       | -3.816903 | 1.013988  | -0.782317 |
| C       | -0.575471 | -3.282030 | -2.410705 |
| C       | 1.512984  | -2.262436 | -3.147950 |
| C       | 0.852397  | -3.275790 | -2.381859 |
| C       | 1.498561  | -3.796226 | -1.184126 |
| C       | 1.509747  | -0.030378 | -3.856279 |
| C       | 0.762006  | -1.267505 | -3.872970 |
| C       | -0.655950 | -1.239624 | -3.838037 |
| C       | -1.326560 | -2.289241 | -3.138318 |
| C       | -3.801992 | 4.500220  | 1.129140  |
| C       | -3.786269 | 4.507343  | -1.189585 |
| H       | -4.801094 | 4.078701  | -1.330432 |
| H       | -3.487812 | 5.021063  | -2.114488 |
| H       | -3.511154 | 5.006931  | 2.060559  |
| H       | -4.819437 | 4.073649  | 1.257304  |
| N       | -3.670442 | 5.384311  | -0.026583 |
| H       | -4.368417 | 6.129752  | -0.028689 |
| isomer8 |           |           |           |
| C       | 2.866346  | -0.293180 | 5.578941  |
| C       | 1.636158  | -2.250221 | 5.553037  |
| H       | 2.506049  | -2.940094 | 5.582933  |
| H       | 0.741815  | -2.791811 | 5.890985  |
| H       | 2.969114  | 0.738548  | 5.943451  |
| H       | 3.862683  | -0.780884 | 5.604968  |
| N       | 1.835157  | -1.018659 | 6.310121  |
| H       | 2.083127  | -1.186360 | 7.286786  |
| Sc      | 1.111336  | -2.294948 | 0.630875  |
| Sc      | 0.485147  | 1.006392  | 1.592560  |
| Sc      | 0.382443  | 0.688364  | -1.981531 |
| C       | 1.326594  | -0.184988 | -0.122868 |
| C       | 0.047555  | -0.510086 | -0.168229 |
| C       | -2.055323 | 3.080255  | -0.915697 |
| C       | -2.445138 | 1.769246  | -1.572716 |
| C       | -1.829837 | 1.399477  | -2.816211 |

|   |           |           |           |
|---|-----------|-----------|-----------|
| C | 4.694644  | -1.344323 | -0.845993 |
| C | -2.053584 | 3.080536  | 0.718702  |
| C | -1.786977 | 1.386055  | 2.580329  |
| C | -2.421980 | 1.761601  | 1.356198  |
| C | -3.084079 | 0.764178  | 0.619062  |
| C | -3.139292 | -0.604043 | -1.283523 |
| C | -2.470713 | -1.009554 | -2.469512 |
| C | -1.827806 | 0.018978  | -3.235109 |
| C | -1.901581 | -2.320509 | -2.509413 |
| C | -3.151686 | -1.451201 | -0.121298 |
| C | -1.884984 | -3.163593 | 1.095049  |
| C | -2.502762 | -2.723813 | -0.124832 |
| C | -1.912663 | -3.163084 | -1.346084 |
| C | -1.762483 | -0.001097 | 2.963222  |
| C | -2.421200 | -1.011723 | 2.214185  |
| C | -3.113182 | -0.603678 | 1.039857  |
| C | -1.833494 | -2.304475 | 2.234095  |
| C | 2.224148  | 1.981233  | -3.240458 |
| C | 1.560436  | 0.963906  | -4.024455 |
| C | -0.635645 | -0.217803 | -4.008216 |
| C | 0.099102  | 1.040592  | -4.150238 |
| C | 1.463770  | 2.965356  | -2.500724 |
| C | -0.605046 | 3.372924  | -1.274090 |
| C | 0.025395  | 2.999000  | -2.507479 |
| C | -0.663877 | 2.066065  | -3.401510 |
| C | 2.225488  | 3.305468  | 1.118976  |
| C | 1.587801  | 3.646492  | -0.109549 |
| C | 2.232412  | 3.316429  | -1.325987 |
| C | 0.153215  | 3.644773  | -0.109428 |
| C | 2.352189  | -0.352261 | 4.101781  |
| C | 0.044317  | -1.535906 | 3.689241  |
| C | 1.483407  | -1.731295 | 4.091934  |
| C | -0.606175 | -2.554744 | 2.951635  |
| C | 3.438083  | -0.618812 | 3.064461  |
| C | 4.684132  | 0.014742  | 1.051514  |
| C | 4.017108  | 0.392012  | 2.257350  |
| C | 3.449391  | 1.713164  | 2.293184  |
| C | 3.364865  | -3.427629 | 0.617481  |
| C | 3.978307  | -2.338020 | 1.332361  |
| C | 3.355381  | -1.942267 | 2.571950  |
| C | 4.672015  | -1.348787 | 0.599334  |
| C | 0.090238  | -3.651996 | 2.299531  |
| C | 1.549681  | -3.698993 | 2.336244  |
| C | 2.170106  | -2.612101 | 3.035022  |
| C | 2.196999  | -4.167616 | 1.101154  |

|   |           |           |           |
|---|-----------|-----------|-----------|
| C | -0.691325 | -3.982534 | 1.110143  |
| C | -0.697472 | -3.945447 | -1.344377 |
| C | -0.057911 | -4.356192 | -0.125722 |
| C | 1.393939  | -4.475560 | -0.099316 |
| C | 4.710960  | 0.858277  | -0.107534 |
| C | 4.046347  | 2.118560  | -0.109778 |
| C | 3.440579  | 2.534469  | 1.119382  |
| C | 3.449602  | 2.554152  | -1.333629 |
| C | 1.476659  | 3.003373  | 2.319923  |
| C | 0.026784  | 3.067518  | 2.342621  |
| C | -0.596304 | 3.359119  | 1.084173  |
| C | -0.634118 | 2.059797  | 3.185900  |
| C | 2.235396  | 1.971293  | 3.032550  |
| C | -0.565889 | -0.260552 | 3.714401  |
| C | 1.577433  | 0.935007  | 3.768417  |
| C | 0.159046  | 1.003461  | 3.858382  |
| C | 4.717076  | 0.021354  | -1.283551 |
| C | 3.402795  | -0.591366 | -3.254658 |
| C | 4.040185  | 0.422112  | -2.477507 |
| C | 3.444097  | 1.721926  | -2.503773 |
| C | 3.335014  | -3.370906 | -0.819634 |
| C | 3.382131  | -1.956765 | -2.815005 |
| C | 3.982410  | -2.331990 | -1.573873 |
| C | -3.094762 | 0.767935  | -0.844732 |
| C | 0.057762  | -3.574719 | -2.517065 |
| C | 2.154150  | -2.559707 | -3.260700 |
| C | 1.476792  | -3.544206 | -2.476233 |
| C | 2.111660  | -3.976954 | -1.257775 |
| C | 2.175309  | -0.333122 | -3.977757 |
| C | 1.410704  | -1.564026 | -3.981679 |
| C | -0.011404 | -1.525975 | -3.941033 |
| C | -0.687081 | -2.571435 | -3.238878 |
| C | -3.022084 | 4.244117  | 1.063236  |
| C | -3.025640 | 4.249180  | -1.254175 |
| H | -4.043326 | 3.825112  | -1.385906 |
| H | -2.731097 | 4.759859  | -2.182079 |
| H | -2.726416 | 4.751718  | 1.992536  |
| H | -4.039255 | 3.818236  | 1.196740  |
| N | -2.897156 | 5.126948  | -0.094127 |
| H | -3.592641 | 5.874741  | -0.092557 |
